# Supplementary material for: Exploring the differential stages of the pigment metabolism by pre-harvest bagging and post-harvest ethylene de-greening of Eureka lemon peel
Source: PeerJ. 2021 Jun 8;9:e11504. doi: 10.7717/peerj.11504 (PMC8194417; doi:10.7717/peerj.11504)
Supplement: Supplemental Information 1 [file peerj-09-11504-s001.xlsx]

## Sheet: Sheet1
chromatic aberration
	Control	error	Bagging	error	Ethylene	error
L*	57.72	4.3	63.73	1.07	59.56	1.16
a*	-12.8	4.04	0.74	2.12	-0.53	0.63
b*	54.85	7.7	53.78	3.93	49.37	2.81
qRT-PCR	https://www.ncbi.nlm.nih.gov/sra/PRJNA606613
chlorophyll
	Control	error	Bagging	error	Ethylene	error
chlorophylla	116.67	1.03	89.96	1.86	56.15	3.27
chlorophyllb	152.33	2.73	86.36	2.01	84.92	1.88
carotenoid	28.66	0.44	62.07	0.54	69.48	0.51
carotenoid content
Sample_ID	α-carotene	α-cryptoxanthin	β-carotene	β-apoline aldehyde	β- cryptoxanthin	γ- carotene	ε- carotene	phytoene	Hexahydro lycopene	lutein	neoxanthin	zeaxanthin	lycopene	violaxanthin	antheraxanthin	astaxanthin	capsanthin	capsorubin
Control1	0.3422	0.2014	3.356	0.1064	2.913	0.3331	N/A	3.821	N/A	16.27	0.2641	2.571	0.6463	2.239	0.2706	N/A	N/A	0.02445
Control2	0.3075	0.2363	3.712	0.1125	3.398	0.3602	N/A	4.081	N/A	15.85	0.2567	2.772	0.6801	2.295	0.294	N/A	N/A	0.02416
Control3	0.3374	0.2094	3.27	0.1058	2.978	0.3218	N/A	3.236	N/A	14.75	0.2526	2.311	0.6362	1.681	0.2515	N/A	N/A	0.02412
Bagging1	0.06192	0.07801	0.07097	0.05604	0.02578	0.1654	N/A	110.7	N/A	0.07315	N/A	1.167	0.639	0.3717	0.007722	N/A	0.115	0.02335
Bagging2	0.06328	0.0765	0.09521	0.06264	0.1072	0.1794	N/A	129.2	N/A	0.1005	N/A	1.491	0.7401	0.406	0.009535	N/A	0.1329	0.02312
Bagging3	0.06086	0.08095	0.09466	0.06123	0.07718	0.1768	N/A	121.7	N/A	0.1184	N/A	1.412	0.7018	0.4696	0.007901	N/A	0.1216	0.02297
Ethylene1	0.06176	0.07473	0.236	0.05431	0.2756	0.1465	N/A	13.27	N/A	1.626	0.0268	1.776	0.6029	0.7107	0.06143	N/A	0.02727	0.02684
Ethylene2	0.06675	0.08291	0.2597	0.06144	0.3459	0.1541	N/A	16.48	N/A	1.896	0.03501	2.25	0.6458	0.8115	0.07182	N/A	0.02757	0.02816
Ethylene3	0.06398	0.07851	0.2283	0.05079	0.191	0.1417	N/A	12.76	N/A	1.655	0.02589	1.984	0.6813	0.7583	0.06314	N/A	0.0275	0.02717
